# Supplementary material for: A polyaniline–zeolite nanocomposite material based acetylcholinesterase biosensor for the sensitive detection of acetylcholine and organophosphates
Source: Royal Society of Chemistry journal article supplement (doi:10.1039/c5nj01049g), 2015-01-01
Supplement: c5nj01049g1.pdf [file c5nj01049g1.pdf]

**Polyaniline-zeolite nanocomposite material based acetylcholinestrerase  
biosensor for the sensitive detection of acetylcholine and organophosphates**

Balwinder Kaur and Rajendra Srivastava\*

**Supporting Information**

### **Synthesis Mechanism for PANI-Nano-ZSM-5**

PANI-Nano-ZSM-5 hybrid material was synthesized by the oxidative polymerization of aniline with ammonium peroxydisulfate (APS) in an aqueous zeolite suspension by the in-situ surface polymerization method. Nano-ZSM-5 was first surface functionalized with propyl amine group to favor the growth of PANI film on the surface of Nano-ZSM-5 and not in the bulk solution. P123 is a neutral polymeric surfactant and is used to prepare a variety of mesostructured materials.<sup>1, 2</sup> P123 is amphiphilic and non ionic surfactant and it can form polymer coils in aqueous solution under a dilute concentration.<sup>3</sup> P123 macromolecules could be attached on the peripheral amine groups of Nano-ZSM-5 nanoparticles through hydrogen bonding. Sodium dodecyl sulfate (SDS) was subsequently added to the solution, which could form a double surfactant layer with negative polar head group of SDS molecule. Aniline monomers could form cationic anilinium ions ( $An^+$ ) under acidic condition.  $An^+$  could adsorb on the surface of Nano-ZSM-5 with electrostatic interaction with double surfactant layer. Upon the addition of APS, PANI nucleation could takes place that are stabilized by the P123/SDS double surfactant layer attached on Nano-ZSM-5 surface.<sup>4</sup> The polymerization usually takes place preferentially and continuously in proximity to existing PANI. Hence, the polymerization was initiated, propagated, and terminated on the surface of Nano-ZSM-5, rather than in bulk solution. Therefore, PANI film was formed on the surface of Nano-ZSM-5.

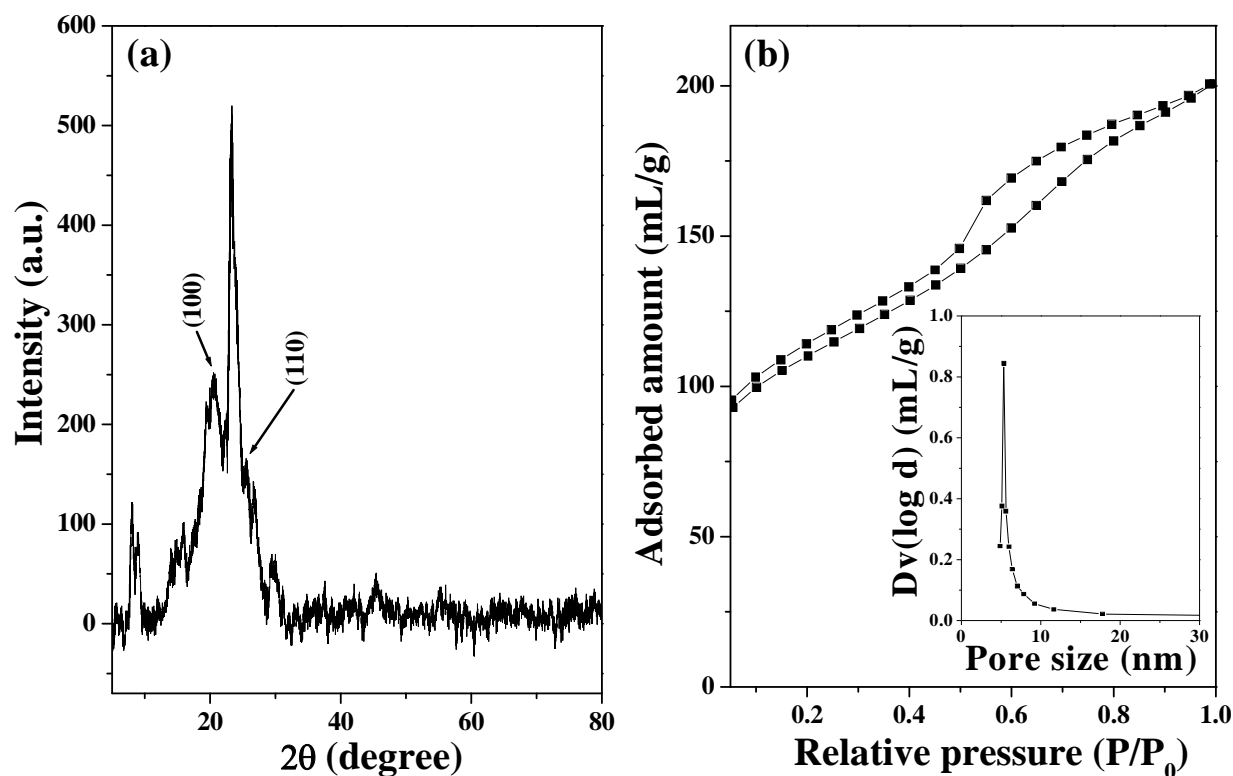

**Fig. S1.** (a) XRD pattern (plane shown here represent the incorporation of PANI in the nanocomposite, remaining XRD diffraction corresponds to Nano-ZSM-5) and (b)  $N_2$ -adsorption isotherm of PANI-Nano-ZSM-5 nanocomposite material (inset shows pore size distribution).

The XRD pattern of PANI-Nano-ZSM-5 exhibited the diffraction peaks corresponding to both, PANI and Nano-ZSM-5, phases. The  $N_2$ -adsorption isotherm for PANI-Nano-ZSM-5 exhibited type-IV isotherm similar to that of mesoporous materials. The mesopores for PANI-Nano-ZSM-5 showed a narrow pore size distribution (5-8 nm). The total surface area, external surface area and total pore volume for PANI-Nano-ZSM-5 was found to be 297  $m^2/g$ , 123  $m^2/g$ , and 0.41  $cm^3/g$ , respectively.

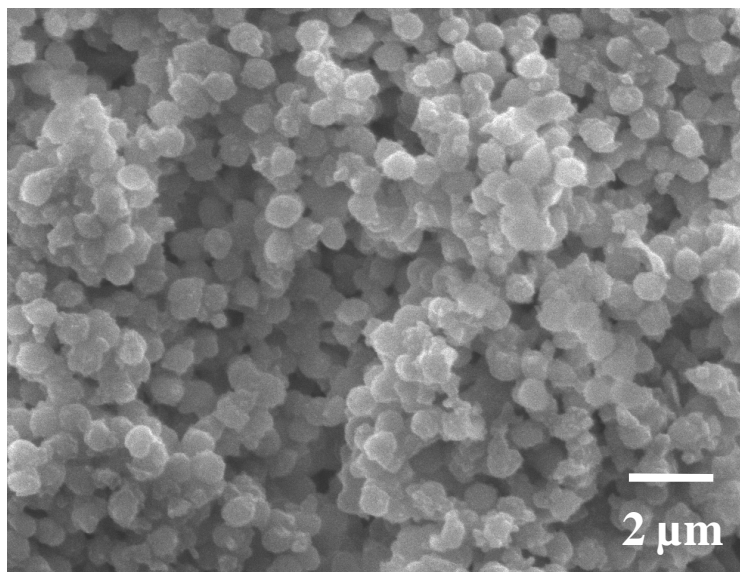

**Fig. S2.** SEM image of PANI-Nano-ZSM-5 nanocomposite.

The SEM image confirmed that PANI film was formed on the surface of spherical Nano-ZSM-5 particles. SEM image also confirmed that no separate phase for bulk PANI was observed.

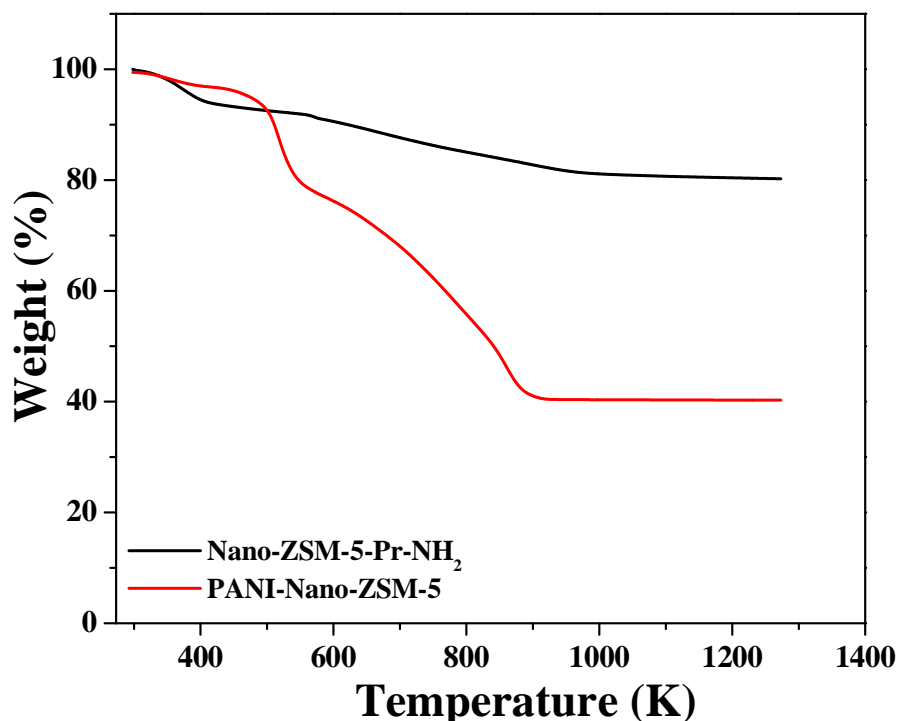

**Fig. S3.** TGA thermograms of Nano-ZSM-5-Pr-NH<sub>2</sub>, and PANI-Nano-ZSM-5 materials at a heating rate of 10 K/min recorded in air stream.

The first weight loss below 473 K in the TGA curves for the samples indicates the loss of physically adsorbed water molecules. In the TGA curve for Nano-ZSM-5-Pr-NH<sub>2</sub>, the second weight loss between 525-875 K can be attributed to the decomposition of organic propylamine moiety anchored on the surface of Nano-ZSM-5 and the residual weight refers to the content of Nano-ZSM-5 in Nano-ZSM-5-Pr-NH<sub>2</sub>. TGA analysis confirmed that Nano-ZSM-5-Pr-NH<sub>2</sub> contains 11 wt % functionalized organic group (-Pr-NH<sub>2</sub>). In the TGA curve for PANI-Nano-ZSM-5, the combustion of PANI in air stream was completed at 913 K and the residual weight refers to the content of Nano-ZSM-5 in the nanocomposite. TGA confirms that PANI-Nano-ZSM-5 nanocomposite contains 40.7 wt % Nano-ZSM-5 and 43.8 wt % PANI. Nano-ZSM-5/PANI weight ratio was found to be 0.93, which was very close to their initial weight ratio.

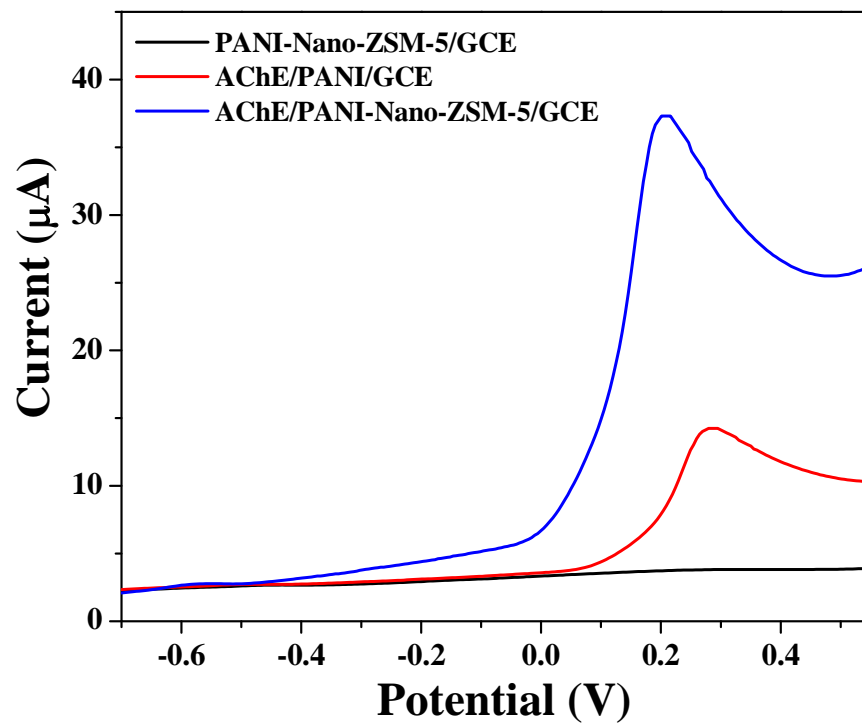

**Fig. S4.** SWVs at different modified electrodes (PANI-Nano-ZSM-5/GCE, AChE/PANI/GCE, and AChE/PANI-Nano-ZSM-5/GCE) in 0.002 M PBS containing 0.1 M NaCl (pH 7.4) in the presence of 1 mM ACh.

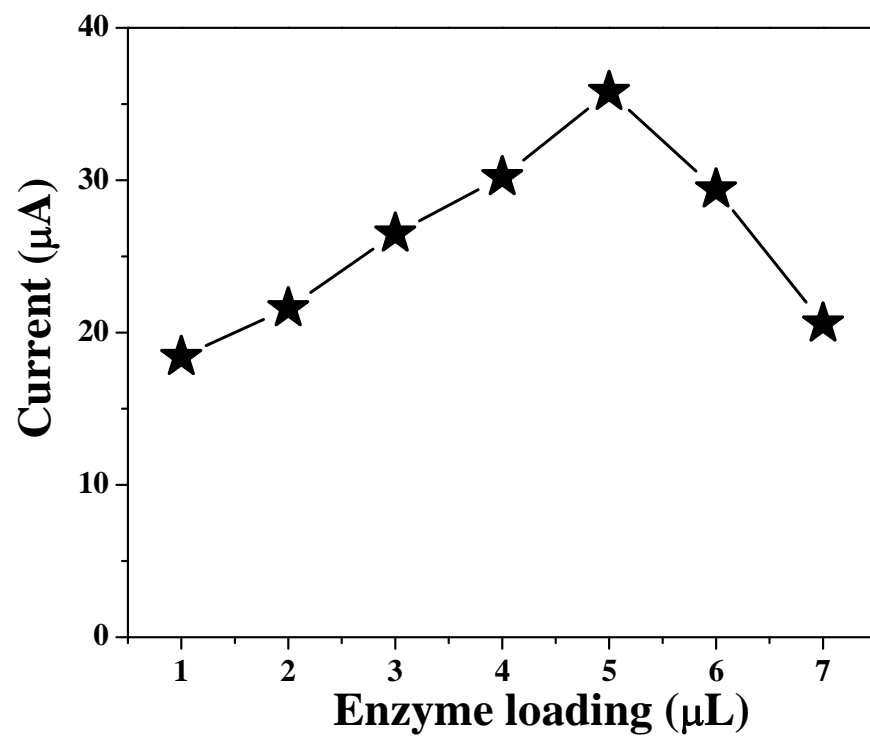

**Fig. S5.** Influence of enzyme loading on AChE/PANI-Nano-ZSM-5/GCE biosensor response in the presence of 1 mM ACh.

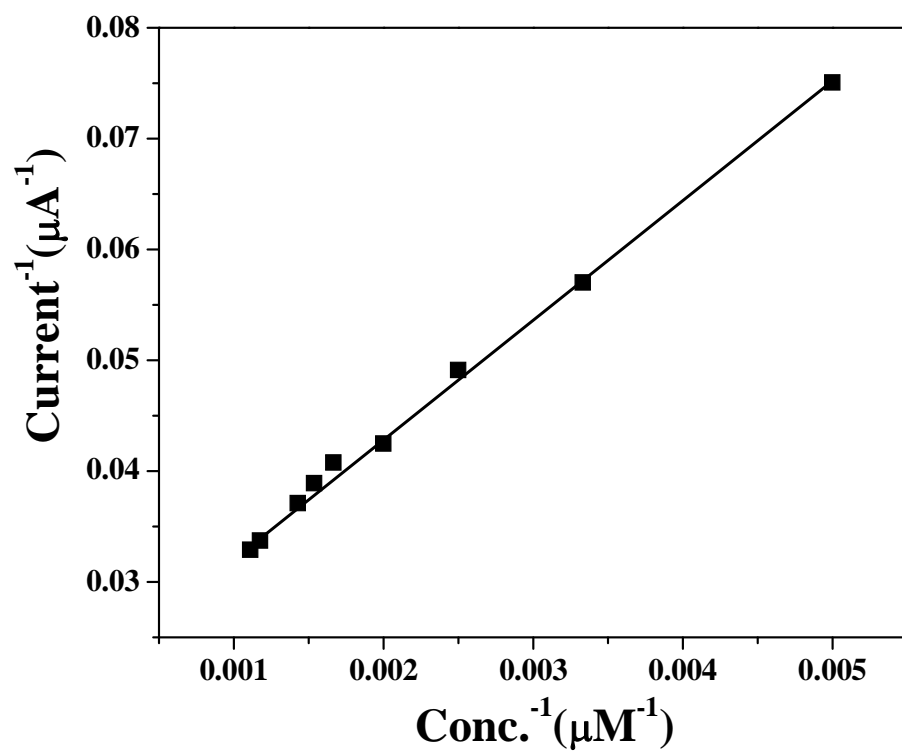

**Fig. S6.** Lineweaver-Burk plot for amperometric response of AChE/PANI-Nano-ZSM-5/GCE biosensor toward ACh addition.

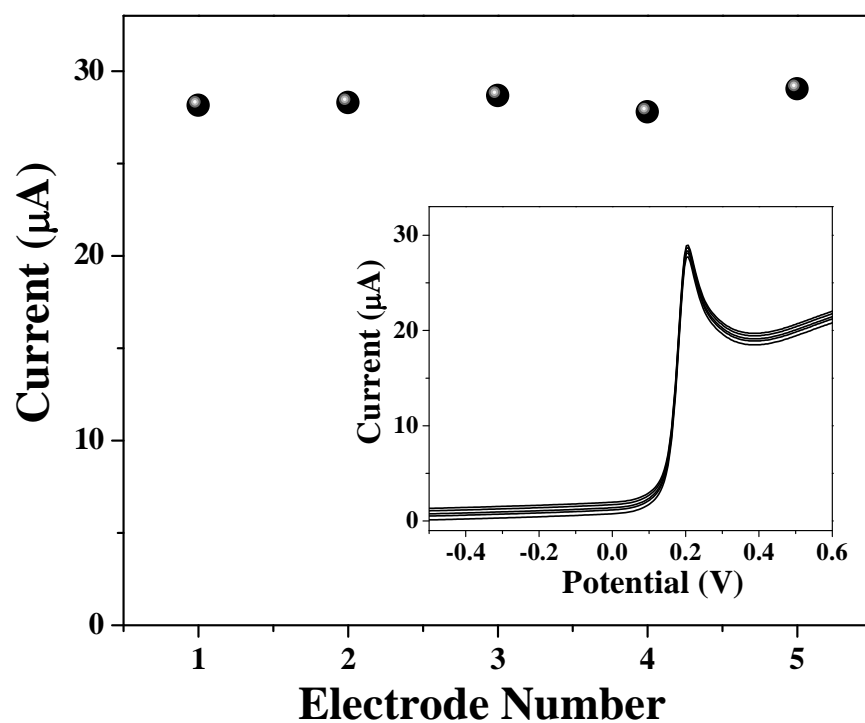

**Fig. S7.** The current response at different freshly prepared AChE/PANI-Nnao-ZSM-5/GCEs ( $n=5$ ) after being immersed in 50 ppb monocrotopos for 5 min. Inset shows corresponding SWV response at 5 different AChE/PANI-Nnao-ZSM-5/GCEs in the presence of 1 mM ACh in 0.002 M PBS containing 0.1 M NaCl (pH 7.4) after being immersed in 50 ppb monocrotopos for 5 min.

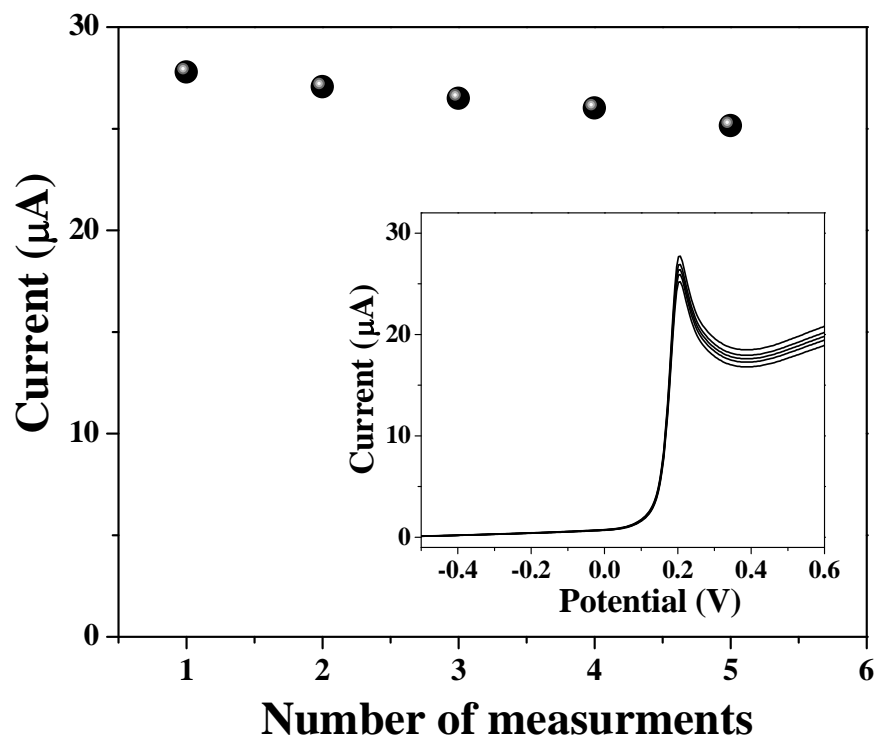

**Fig. S8.** The current response at five different measurements using same AChE/PANI-Nano-ZSM-5/GCE after being immersed in 50 ppb monocrotopos for 5 min. Inset shows corresponding SWV response at 5 different measurements using same AChE/PANI-Nano-ZSM-5/GCE in the presence of 1 mM ACh in 0.002 M PBS containing 0.1 M NaCl (pH 7.4) after being immersed in 50 ppb monocrotopos for 5 min.



**Table S1.** Comparison of AChE/PANI-Nano-ZSM-5/GCE biosensor with other biosensors reported in the literature for OP detection.

| S.No. | Modified electrode                                     | OP pesticide               | Linear range (ppb)  | Detection limit (ppb) | Michaelis-Menten constant | Reference          |
|-------|--------------------------------------------------------|----------------------------|---------------------|-----------------------|---------------------------|--------------------|
| 1.    | ZnO-AChE                                               | paraoxon                   | 35 – 1380           | 35                    | -                         | <a href="#">5</a>  |
| 2.    | AChE-TiO <sub>2</sub> -G/GCE                           | carbaryl                   | 1 – 15              | 0.3                   | 220 $\mu$ M               | <a href="#">6</a>  |
| 3.    | AChE-PAn-PPy-MWCNTs/GCE                                | Malathion                  | 10 – 500            | 1                     | -                         | <a href="#">7</a>  |
| 4.    | AChE/PBNCs/rGO                                         | monocrotophos              | 1 – 600             | 0.1                   | -                         | <a href="#">8</a>  |
| 5.    | AChE/gold nanoparticle/sol-gel                         | Monocrotophos              | 0.1 – 1000          | 0.6                   | 450 $\mu$ M               | <a href="#">9</a>  |
| 6.    | AChE-AuNP-polypyrrole nanowires                        | Methyl parathion           | 5 – 120             | 2                     | -                         | <a href="#">10</a> |
| 7.    | Au-TiO <sub>2</sub> /chitosan                          | Parathion                  | 1 – 7000            | 0.5                   | -                         | <a href="#">11</a> |
| 8.    | PPy-AChE-Geltn-Glut/Pt                                 | Paraoxon                   | 12.5 – 150          | 1.1                   | 2 mM                      | <a href="#">12</a> |
| 9.    | CdTe/gold nanoparticles modified chitosan microspheres | Monocrotophos              | 1 – 1000            | 0.3                   | -                         | <a href="#">13</a> |
| 10.   | MWCNT for solid-phase extraction                       | Methyl parathion           | 50 – 2000           | 5                     | -                         | <a href="#">14</a> |
| 11.   | AChE-Er-GRO-Nafion/GCE                                 | dichlorvos                 | 5 – 100             | 2                     | 700 $\mu$ M               | <a href="#">15</a> |
| 12.   | AChE-MWCNTs-Au-CHIT/GCE                                | malathion                  | 1 – 1000            | 0.6                   | 268 $\mu$ M               | <a href="#">16</a> |
| 13.   | AChE/PANI-Nano-ZSM-5/GCE                               | Monocrotopos<br>Dichlorvos | 1 -1000<br>3 - 1000 | 0.1<br>0.2            | 232 $\mu$ M               | This work          |

**Table S2.** The electro-catalytic response of AChE/PANI-Nano-ZSM-5/GCE biosensor toward the detection of different OP pesticides.

| S.No. | OP pesticide                                                                                      | Linear range<br>(ppb) | Detection<br>limit (ppb) | Inhibition<br>time (min) | Reactivation<br>time (min) |
|-------|---------------------------------------------------------------------------------------------------|-----------------------|--------------------------|--------------------------|----------------------------|
| 1.    | 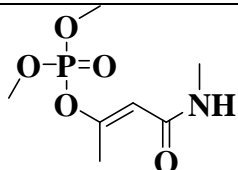<br>Monocrotopos | 1 - 1000              | 0.1                      | 5                        | 7                          |
| 2.    | 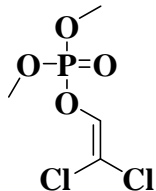<br>Dichlorvos   | 3 - 1000              | 0.2                      | 5                        | 7                          |

## References

1. M. U. Anu Prathap, B. Kaur and R. Srivastava, *J. Colloid Interface Sci.*, 2012, **381**, 143-151.
2. M. U. Anu Prathap, B. Thakur, S. N. Sawant and R. Srivastava, *Colloids Surf., B*, 2012, **89**, 108-116.
3. P. Alexandridis and T. A. Hatton, *Colloids Surf., A*, 1995, **96**, 1-46.
4. S. Xuan, Y.-X. J. Wang, K. C.-F. Leung and K. Shu, *J. Phys. Chem. C*, 2008, **112**, 18804-18809.
5. R. Sinha, M. Ganesana, S. Andreescu and L. Stanciu, *Anal. Chim. Acta*, 2010, **661**, 195-199.
6. K. Wang, H.-N. Li, J. Wu, C. Ju, J.-J. Yan, Q. Liu and B. Qiu, *Analyst*, 2011, **136**, 3349-3354.
7. D. Du, X. Ye, J. Cai, J. Liu and A. Zhang, *Biosens. Bioelectron.*, 2010, **25**, 2503-2508.
8. L. Zhang, A. Zhang, D. Du and Y. Lin, *Nanoscale*, 2012, **4**, 4674-4679.
9. D. Du, S. Chen, J. Cai and A. Zhang, *Biosens. Bioelectron.*, 2007, **23**, 130-134.
10. J. Gong, L. Wang and L. Zhang, *Biosens. Bioelectron.*, 2009, **24**, 2285-2288.
11. Y. Qu, H. Min, Y. Wei, F. Xiao, G. Shi, X. Li and L. Jin, *Talanta*, 2008, **76**, 758-762.
12. R. R. Dutta and P. Puzari, *Biosens. Bioelectron.*, 2014, **52**, 166-172.
13. D. Du, S. Chen, D. Song, H. Li and X. Chen, *Biosens. Bioelectron.*, 2008, **24**, 475-479.
14. D. Du, M. Wang, J. Zhang, J. Cai, H. Tu and A. Zhang, *Electrochem. Commun.*, 2008, **10**, 85-89.
15. S. Wu, F. Huang, X. Lan, X. Wang, J. Wang and C. Meng, *Sens. Actuators, B: Chem.*, 2013, **177**, 724-729.
16. D. Du, M. Wang, J. Cai, Y. Qin and A. Zhang, *Sens. Actuators, B: Chem.*, 2010, **143**, 524-529.
